# Supplementary material for: Intratumoral SIRPα-deficient macrophages activate tumor antigen-specific cytotoxic T cells under radiotherapy
Source: PubMed Central journal article supplement (PMC8163884; doi:10.1038/s41467-021-23442-z), 2021-05-28
Supplement: 41467_2021_23442_MOESM1_ESM.pdf [file 41467_2021_23442_MOESM1_ESM.pdf]

**a**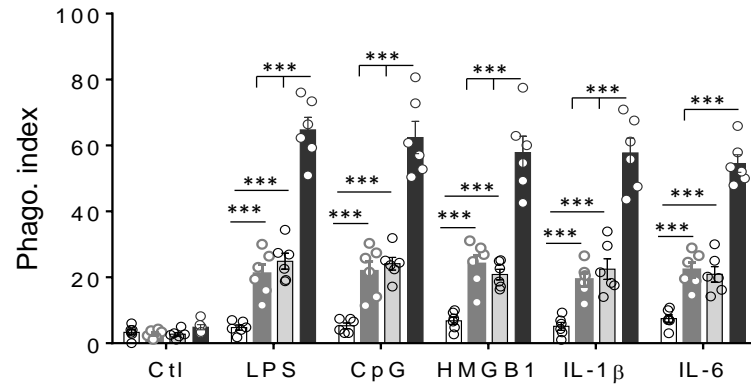**b**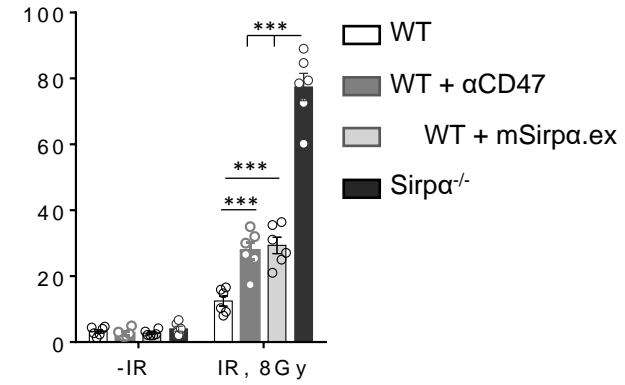**c**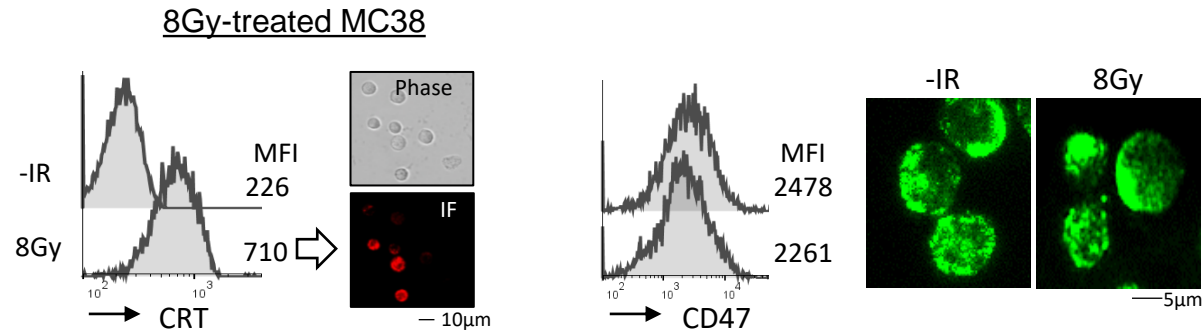**d**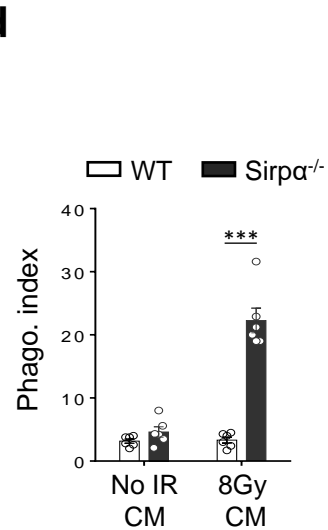**e**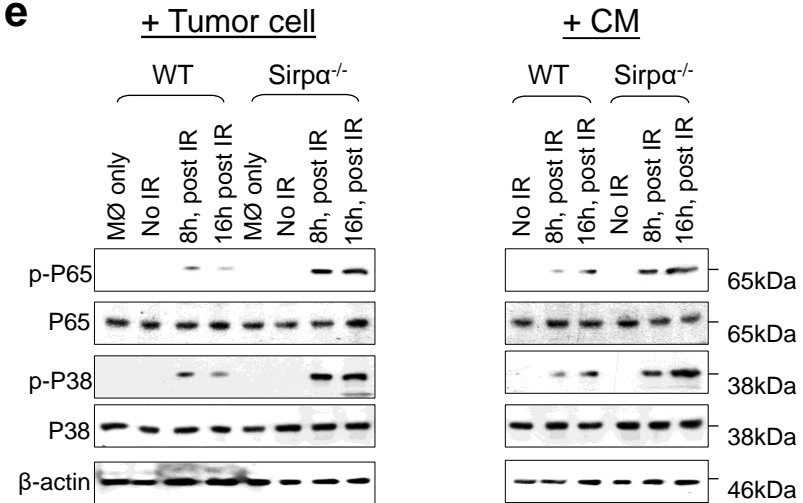

Supplementary Figure. 1. Phagocytosis of MC38 cells by activated Sirp $\alpha^{-/-}$  macrophage. **a**, Phagocytosis of MC38 cells by LPS, CpG, HMGB1, IL-1 $\beta$  or IL-6 activated WT and Sirp $\alpha^{-/-}$  BMDM in the presence or absence of CD47 antibody or SIRP $\alpha$  extracellular domain fusion protein (mSirp $\alpha$ .ex). Experiments were performed in duplicate and data from three independent experiments are presented as mean  $\pm$  SEM. n = 6 per group. \*\*\*,  $P < 0.001$ ; **b**, Phagocytosis of 8Gy-treated MC38 cells by WT and Sirp $\alpha^{-/-}$  BMDM. Experiments were performed in duplicate and data from three independent experiments are presented as mean  $\pm$  SEM. n = 6 per group. \*\*\*,  $P < 0.001$  **c**, Immunostaining of calreticulin (CRT) and CD47 on non-treated and irradiated MC38 cells. Data are representative images from three independent experiments. **d**, Conditioned medium from irradiated MC38 cells induce Sirp $\alpha^{-/-}$  macrophage to phagocytize MC38 cells. Experiments were performed in duplicate and data from three independent experiments are presented as mean  $\pm$  SEM. n = 6 per group. \*\*\*,  $P < 0.001$  **e**, Western blot of P65 and P38 in WT and Sirp $\alpha^{-/-}$  BMDM after incubated with irradiated MC38 cells or their conditioned medium. Data are representative images from three independent experiments.  $P$  values were calculated by one-way ANOVA with Tukey's post hoc test. Source data are provided as a Source Data file.

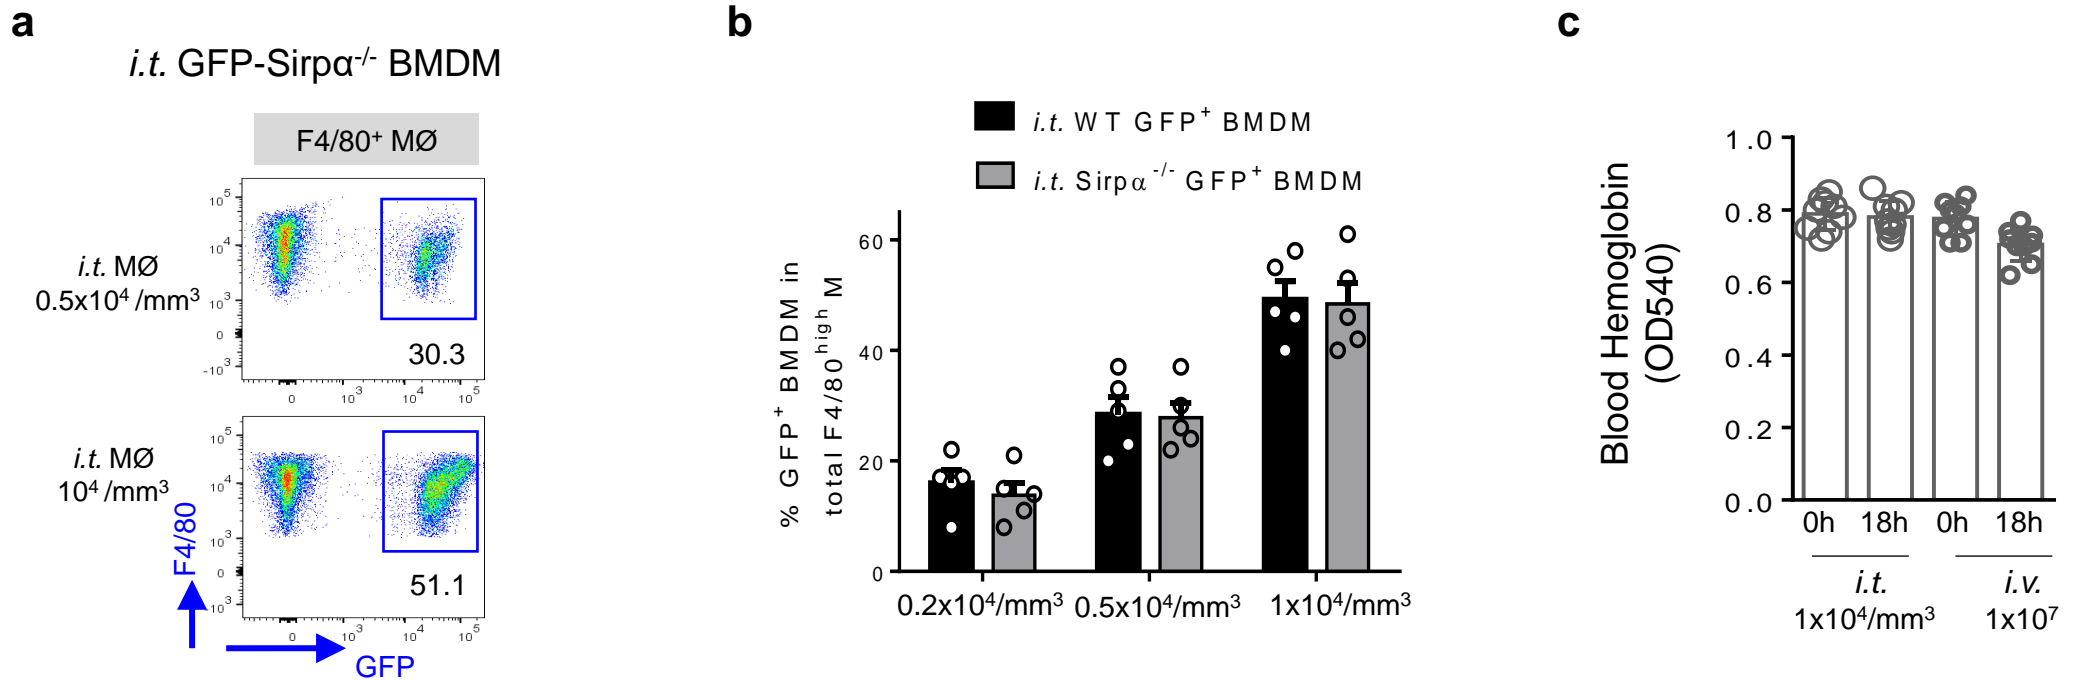

Supplementary Figure 2. Infusion of Sirp $\alpha^{-/-}$  BMDMs into the engrafted tumor in WT mice. a-b) The frequency of infused GFP<sup>+</sup> WT or Sirp $\alpha^{-/-}$  BMDMs in MC38 tumors. GFP<sup>+</sup> WT or Sirp $\alpha^{-/-}$  BMDM were *i.t.* injected into MC38 tumor in WT recipient mice. The frequency of infused BMDM within F4/80<sup>high</sup> TAM after 30mins of infusion were assessed by FACS (a) and summarized (b). n = 5 per group. c) Anemia analysis in mice 18 h post-Sirp $\alpha^{-/-}$  BMDM infusion. Data from three independent experiments with 3 mice/group in each experiments are presented as mean  $\pm$  SEM. n = 9 per group. Source data are provided as a Source Data file.

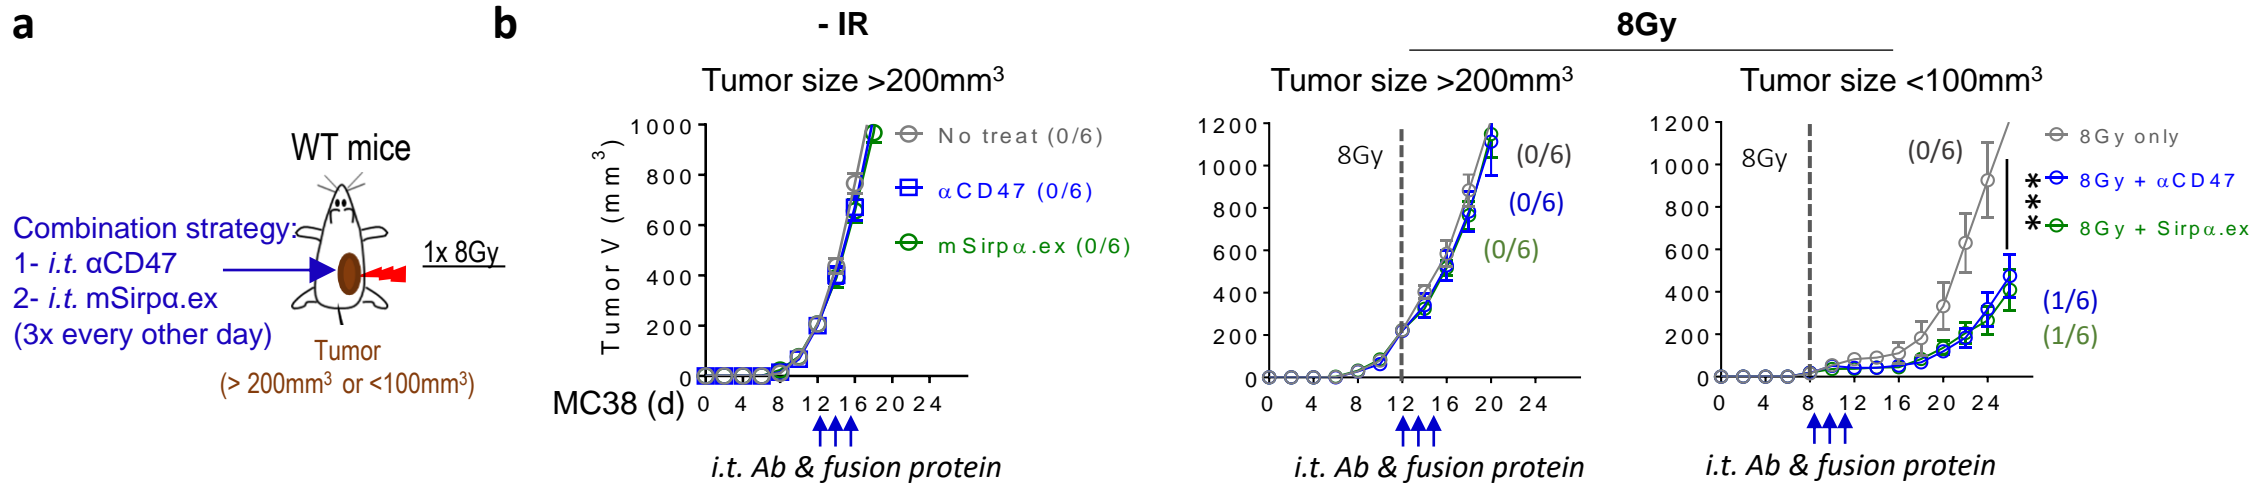

Supplementary Fig. 3. CD47 blockade alone or combination with IR failed to eliminate the well-established tumors. **a**, Depict of various combinations of treatments in tumor-bearing WT mice. Anti-CD47 antibody or mSIRP $\alpha$ .ex fusion protein was *i.t.* injected (50 $\mu$ g/mouse). **b**, Tumor growth in MC38-bearing WT mice after combining IR with CD47-blockade reagents. Data from two independent experiments (3 mice/group in each experiment) are presented as mean  $\pm$  SEM. n = 6 mice in all groups. \*\*\*,  $P < 0.001$ ; one-way ANOVA with Tukey's post hoc test. Source data are provided as a Source Data file.

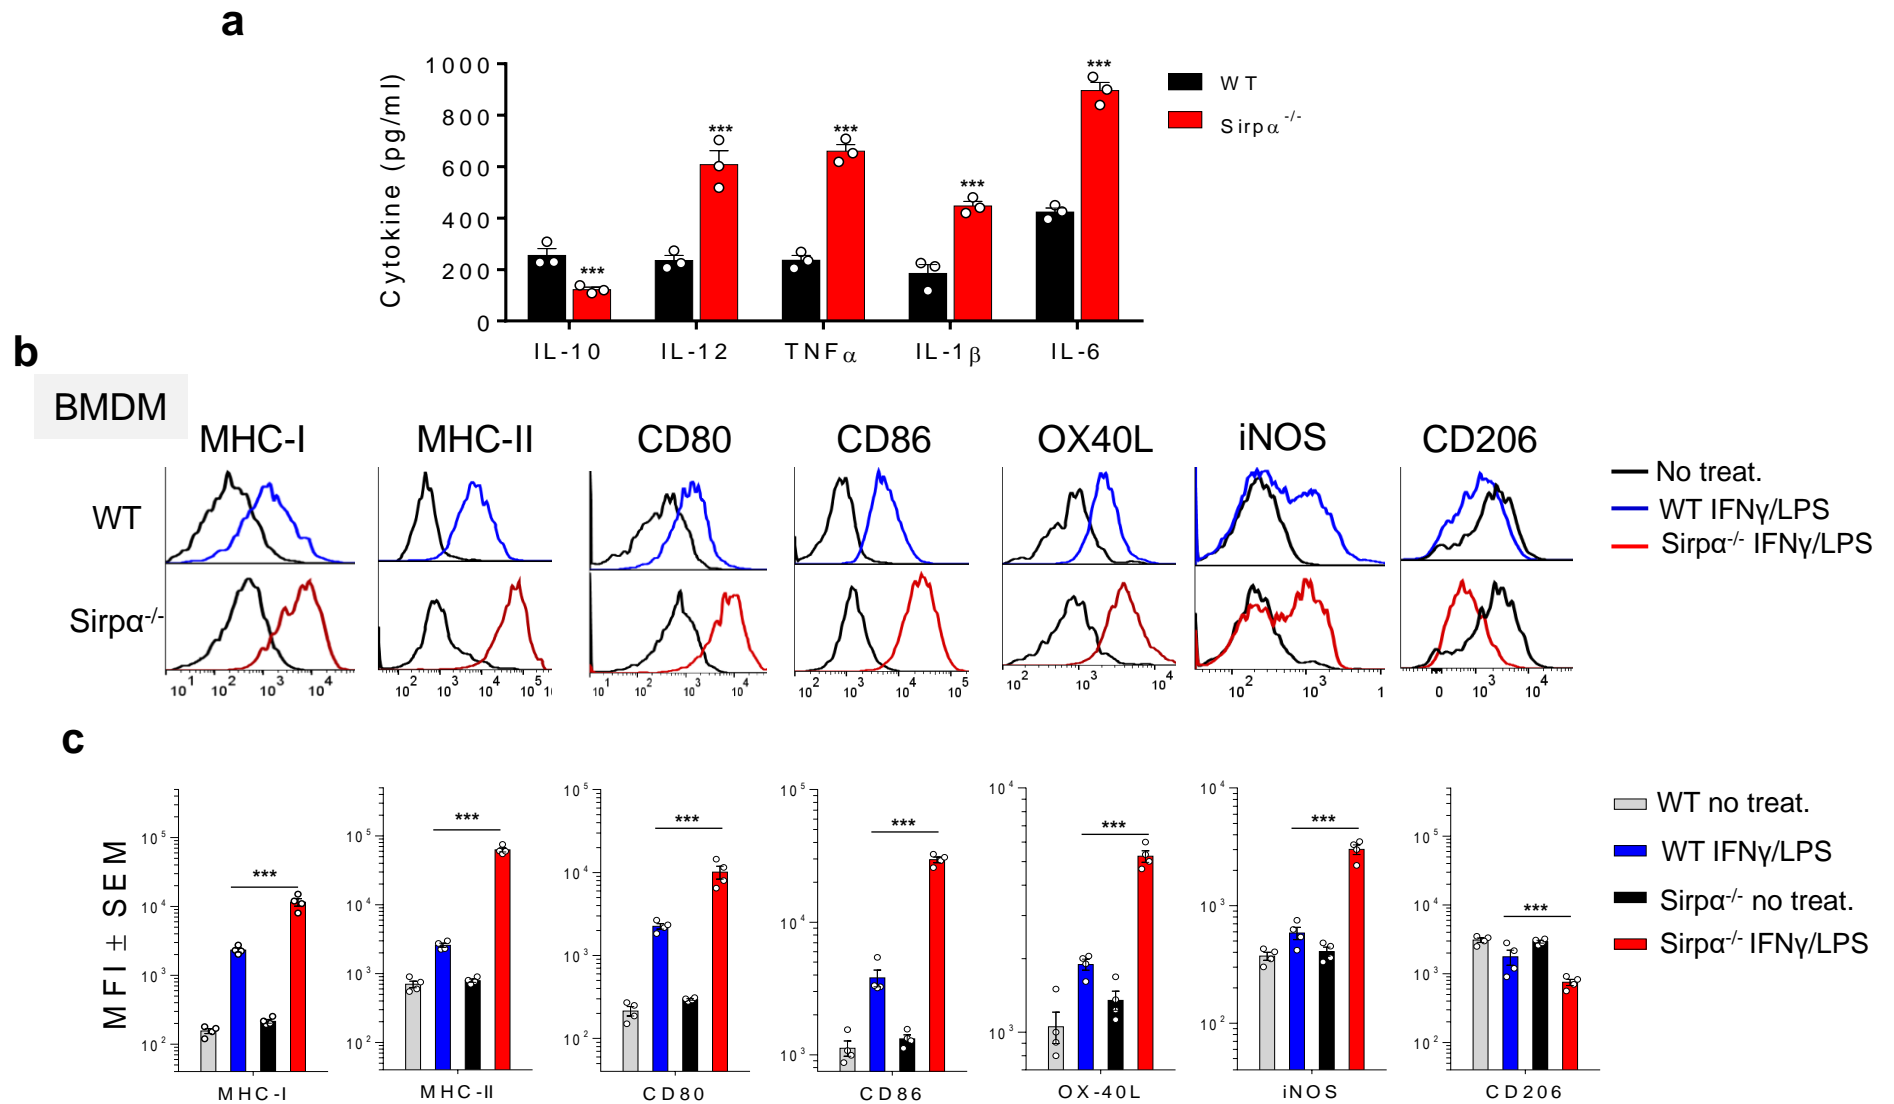

Supplementary Fig. 4. Enhanced expression of pro-inflammatory cytokines and antigen presentation related molecules in Sirpα<sup>-/-</sup> BMDM. **a**, Production of pro-and anti-inflammatory cytokines in WT and Sirpα<sup>-/-</sup> BMDM after IFNγ/LPS (20ng/ml each, 18h) treatment. \*\*\*,  $P < 0.001$ .  $n = 3$  in all groups. **b-c**, Antigen presentation molecules and M1/M2 marker on WT and Sirpα<sup>-/-</sup> BMDM before and after IFNγ/LPS activation. Data from two independent experiments are presented as mean  $\pm$  SEM.  $n = 4$  in all groups. \*\*\*,  $P < 0.001$ .  $P$  values were calculated by one-way ANOVA with Tukey's post hoc test (a and c). Source data are provided as a Source Data file.

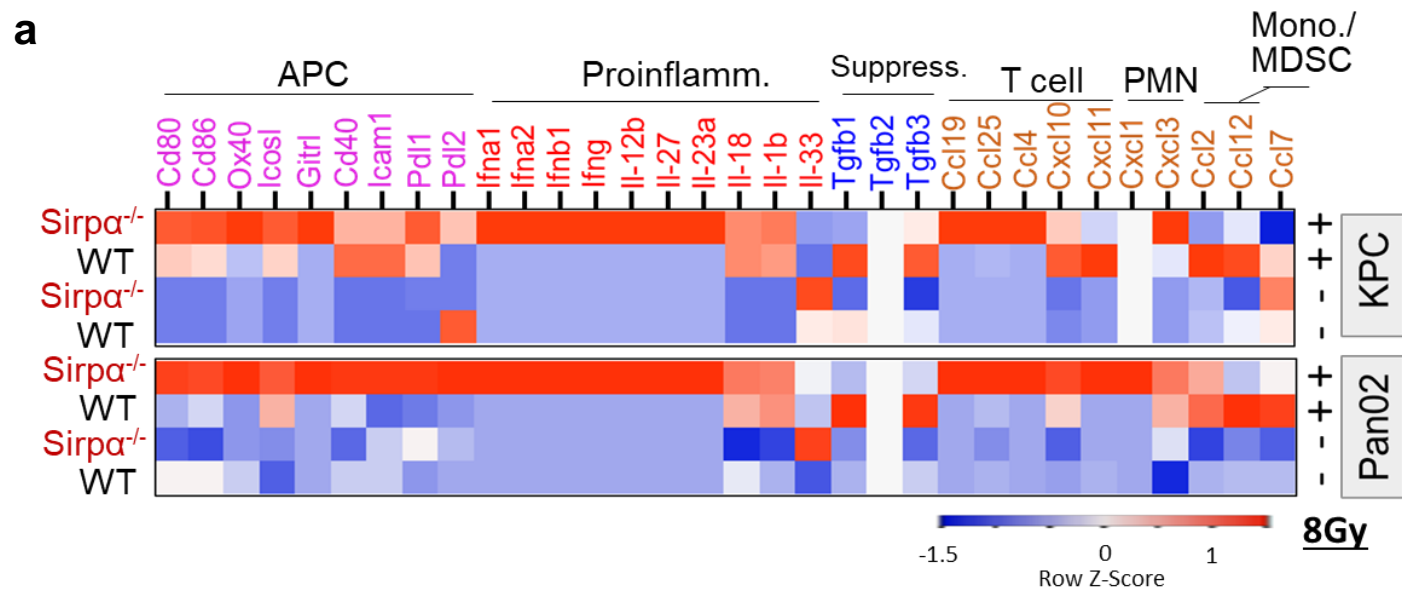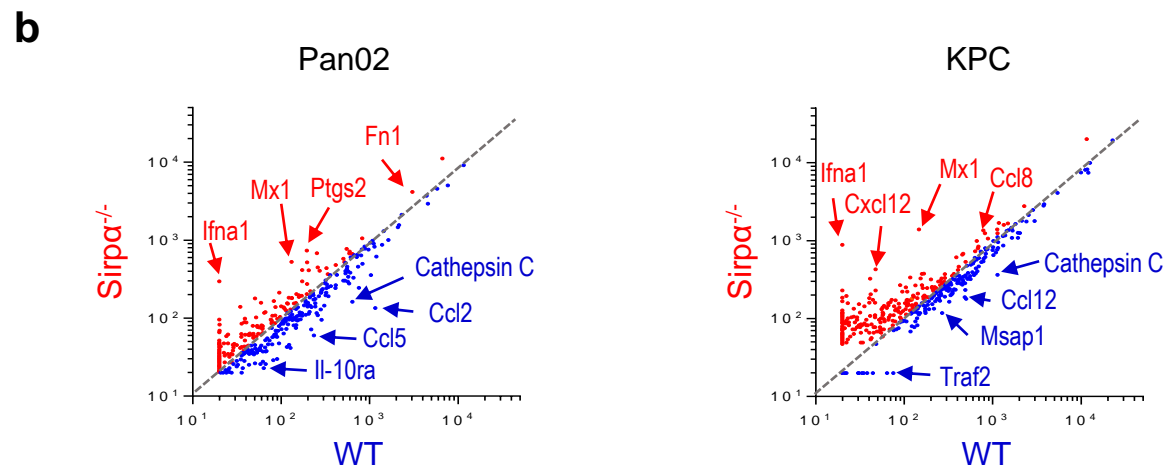

Supplementary Fig. 5. Nanostring analysis of mRNA expression profile in Pan02 and KPC tumors before and 12h post IR. Heatmap (a) and scatterplot (b) depicting differential expression of genes involved in antigen presentation, pro-inflammation, anti-inflammation and chemokines n = 4 mice in each group.

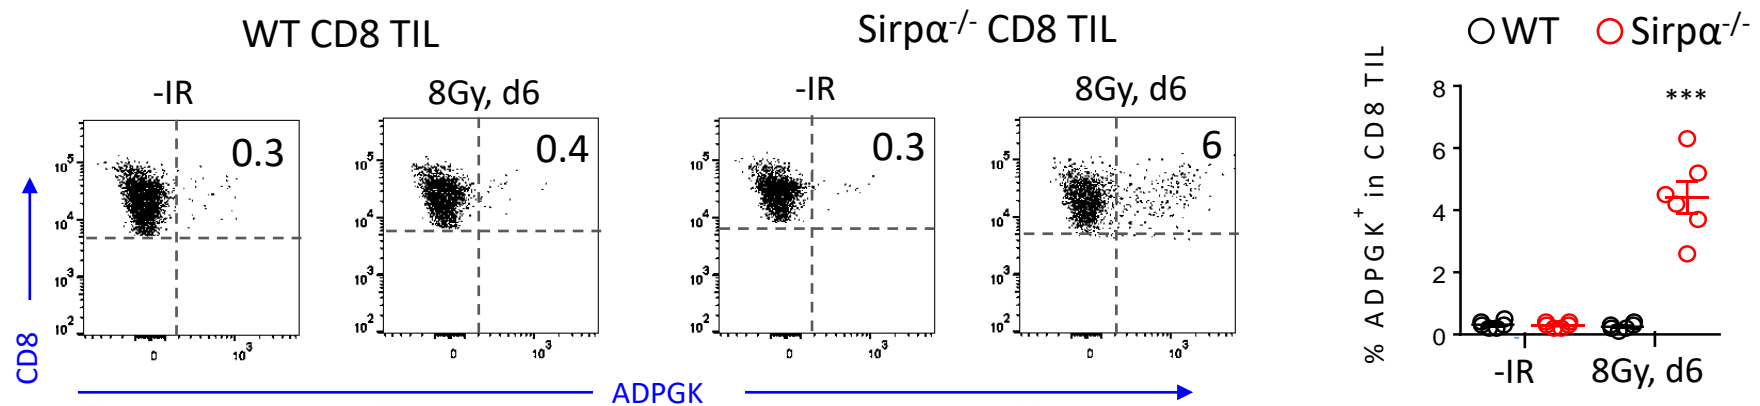

Supplementary Fig. 6. Percentage of ADPGK-tetramer<sup>+</sup> cells in total CD8 TILs from WT and Sirpα<sup>-/-</sup> TME before and after IR. Left, representative flow cytometry image; Right, statistical results of percentage of ADPGK-tetramer<sup>+</sup> cells in total TILs. Data from two independent experiments (3 mice/group in each experiment) are presented as mean ± SEM. n = 6 mice in all groups.\*\*\*, *P* < 0.001; one-way ANOVA with Tukey's post hoc test. Source data are provided as a Source Data file.

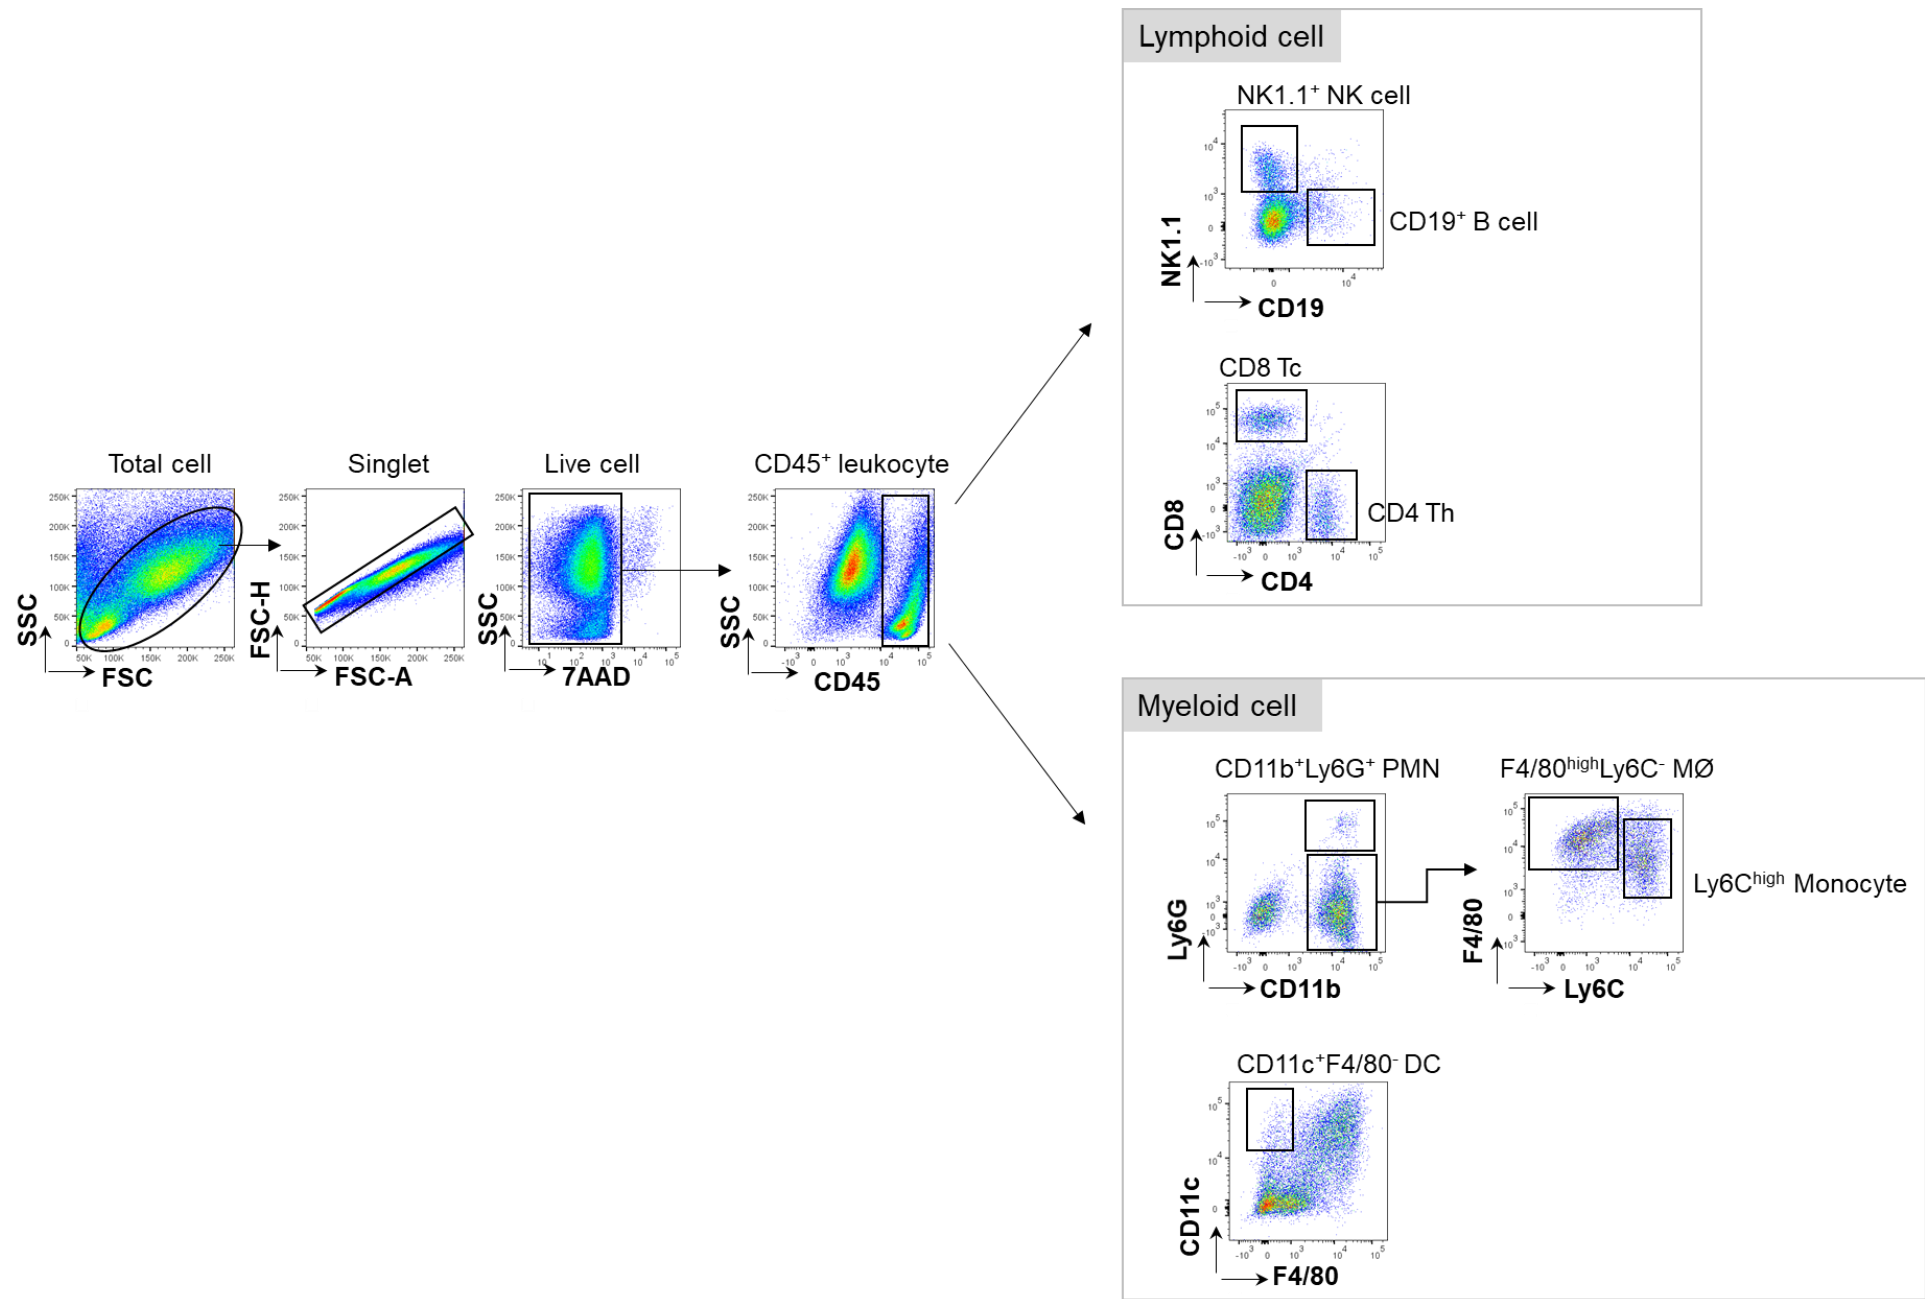

Supplementary Fig. 7. Gating strategy for flow cytometry analysis of leukocytes population in tumor microenvironment.



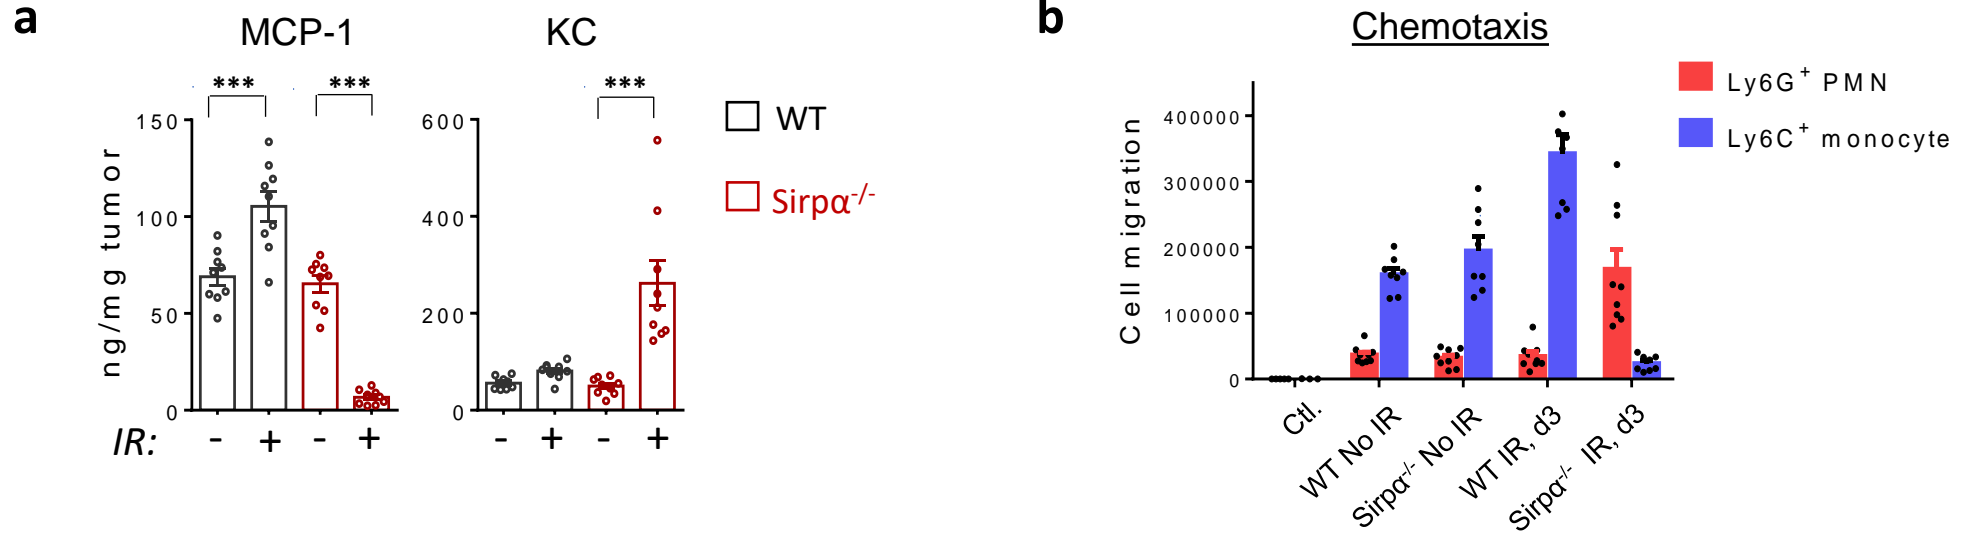

Supplementary Fig. 8. Chemokine analysis of conditioned medium of MC38 tumor isolated from WT and Sirpα<sup>-/-</sup> mice before and 3 days post-IR. **a**, Concentration of MCP-1 and KC in tumor conditioned medium from WT and Sirpα<sup>-/-</sup> MC38 tumor before and 3 days post-IR. **b**, Chemotaxis assay of Ly6C<sup>+</sup> monocytes/monocytic MDSCs and Ly6G<sup>+</sup> PMNs toward tumor conditioned medium. Data from three independent experiments are presented as mean ± SEM. n = 9 for Ly6G<sup>+</sup> PMN, n = 8 for Ly6C<sup>+</sup> monocyte. \*\*\*, *P* < 0.001; one-way ANOVA with Tukey's post hoc test. Source data are provided as a Source Data file.

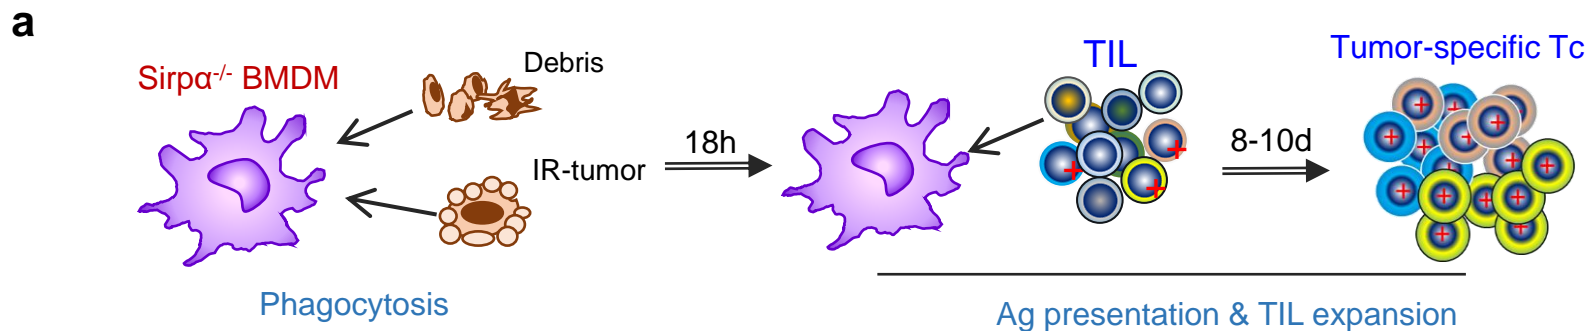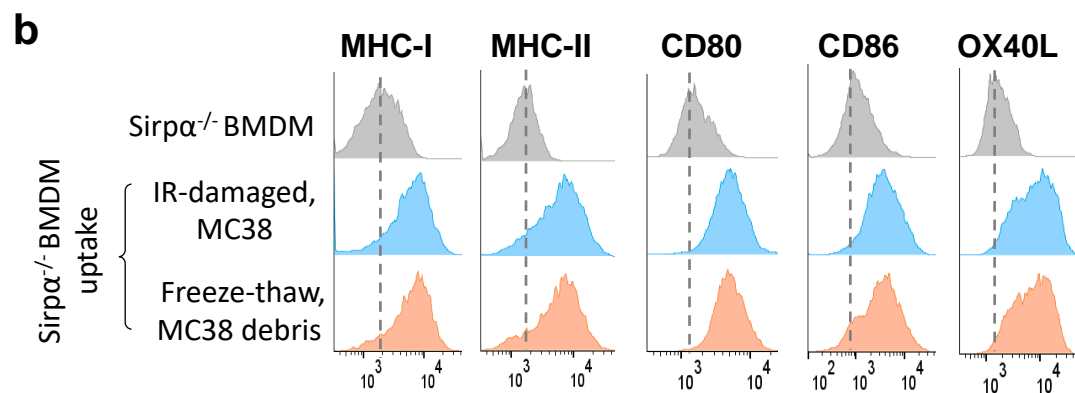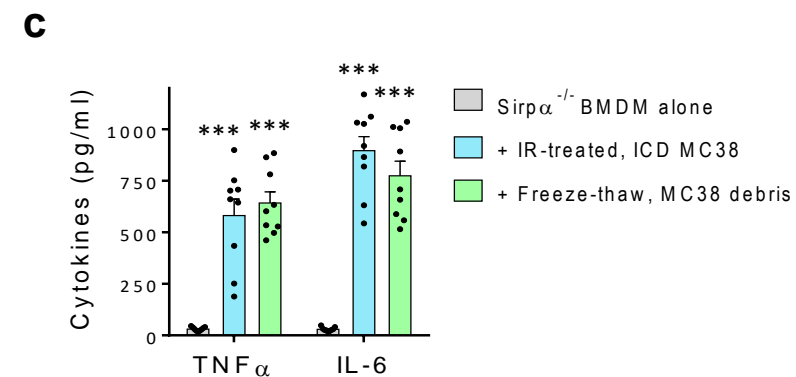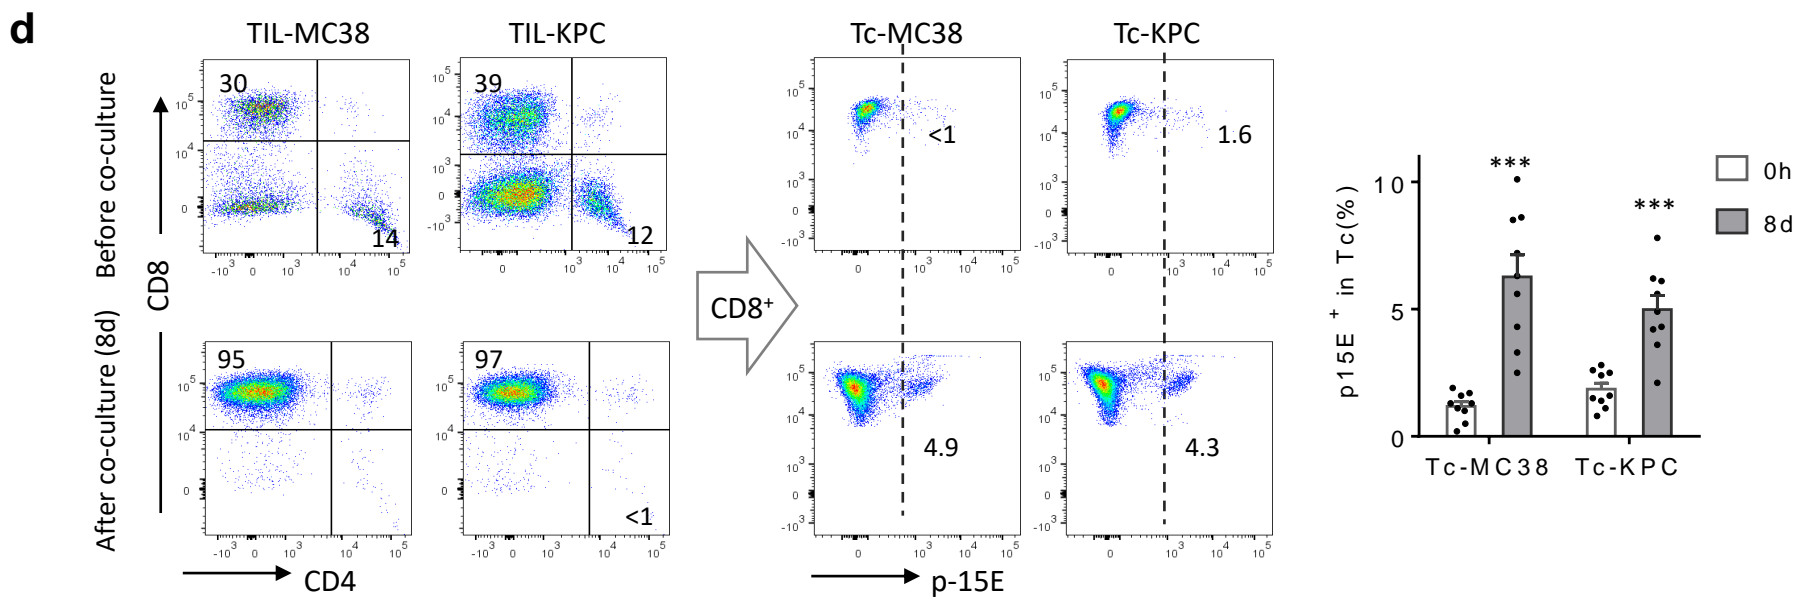

Supplementary Figure. 9. Sirp $\alpha^{-/-}$  BMDMs present tumor antigen to activate tumor-specific Tc cells. **a**, A schema of the experimental design. **b**, Upregulation of MHC-I, MHC-II, CD80, CD86 and OX40L on Sirp $\alpha^{-/-}$  BMDM surface after tumor antigen uptake. Untreated Sirp $\alpha^{-/-}$  BMDMs were used as negative control. Data are representative images from three independent experiments. **c**, Production of TNF $\alpha$  and IL-6 by Sirp $\alpha^{-/-}$  BMDMs after tumor antigen uptake. Data from three independent experiments are presented as mean  $\pm$  SEM. n = 9 in all groups. \*\*\*,  $P < 0.001$  **d**, Frequency of p-15E Tetramer<sup>+</sup> CD8 Tc cells before and after co-culture. TILs isolated from MC38 or KPC tumors were co-cultured with Sirp $\alpha^{-/-}$  BMDMs loaded with corresponding tumor antigens. CD8 Tc before and after co-cultured were gated and frequency of p-15E Tetramer<sup>+</sup> Tc cells were determined by FACS. Data from three independent experiments are presented as mean  $\pm$  SEM. n = 9 in each group. \*\*\*,  $P < 0.001$ ; one-way ANOVA with Tukey's post hoc test (**c** and **d**). Source data are provided as a Source Data file.

( ⚡, 8Gy on primary tumor; ○, abscopal tumor )

WT

Sirpa<sup>-/-</sup>

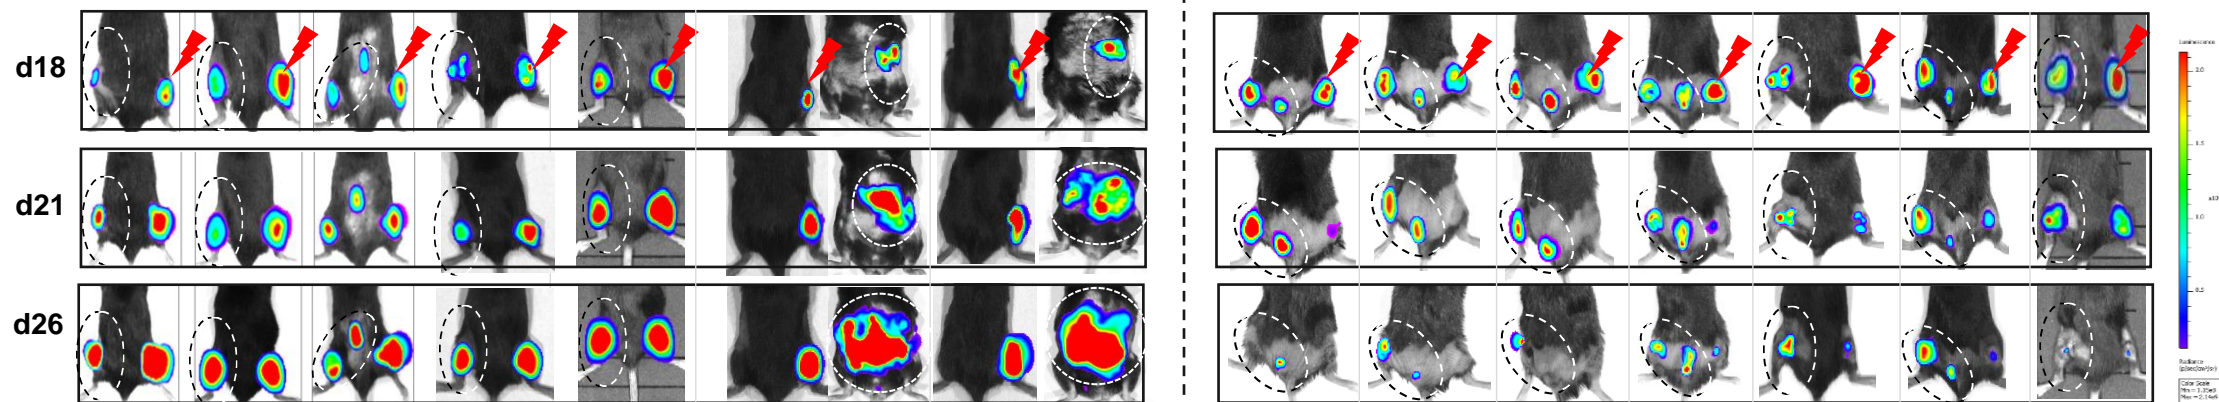

WT

Sirpa<sup>-/-</sup>

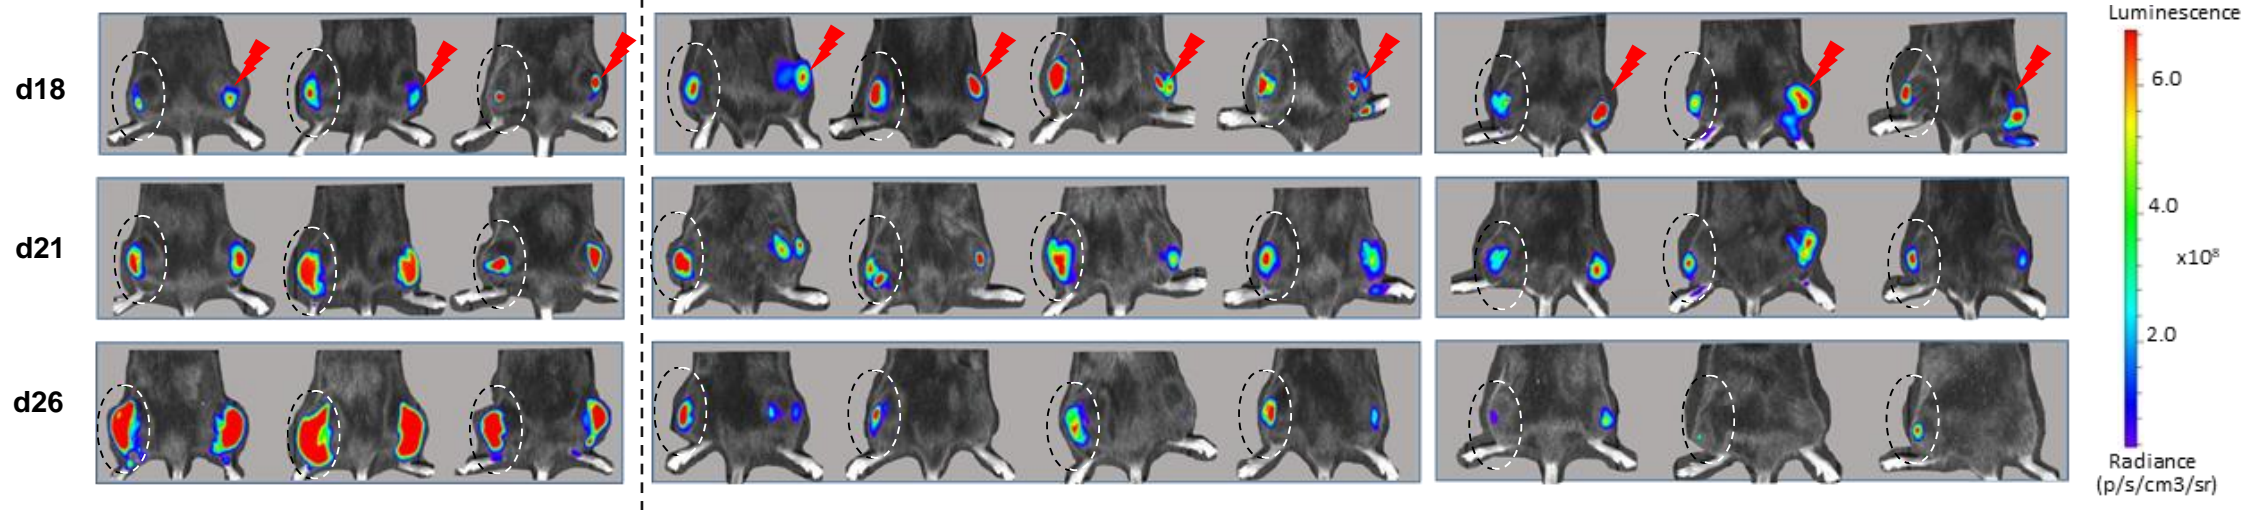

Supplementary Fig. 10. Supplemental images of Fig. 7

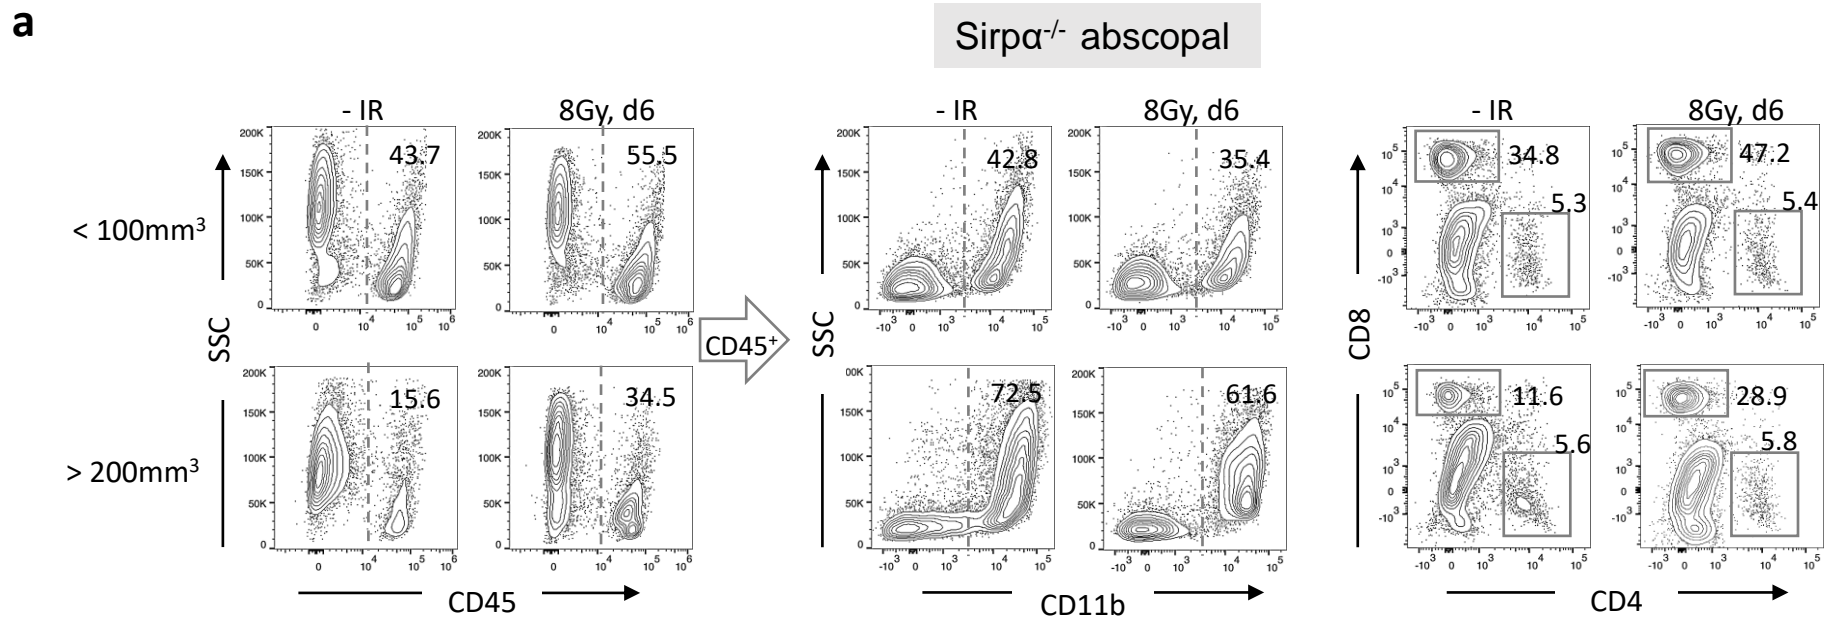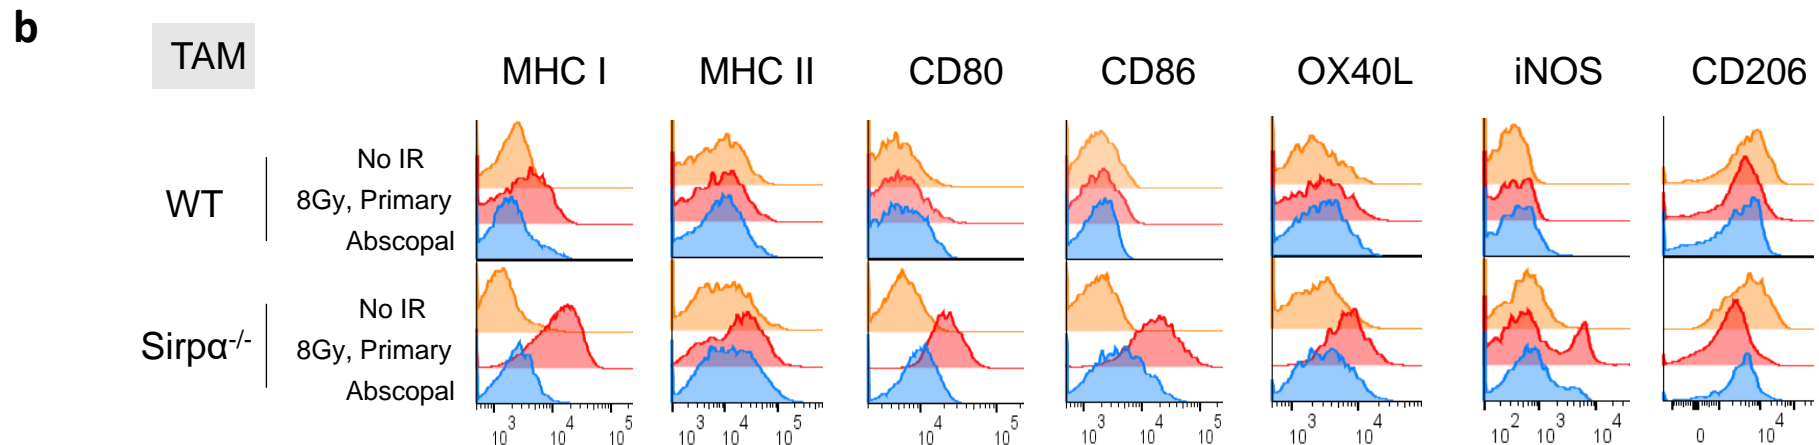

Supplementary Fig. 11. TME analysis of abscopal tumors. **a**, Leukocytes population in abscopal tumor before and after radiation of primary tumor. Primary tumors received 8Gy radiation when the abscopal tumors were <100mm<sup>3</sup> or >200mm<sup>3</sup>. Leukocytes population including CD11b<sup>+</sup> myeloid cells, CD4<sup>+</sup>Th and CD8<sup>+</sup>Tc within abscopal was analyzed by FACS. **b**, Expression of MHC I, MHC II, CD80, CD86, OX40L, iNOS and CD206 in abscopal TAM after radiation of primary tumor. Data are representative images from two independent experiments. n = 6 mice in each group.

Supplementary Table 1: Table of antibodies used in this study.

| <b>Name</b>                           | <b>Clone</b> | <b>Manufacture</b> | <b>Catalog Number</b> | <b>Dilution</b> |
|---------------------------------------|--------------|--------------------|-----------------------|-----------------|
| FITC anti-mouse/human CD11b           | M1/70        | BioLegend          | 101206                | 1:100           |
| FITC anti-mouse CD4                   | rm4-5        | BioLegend          | 100510                | 1:100           |
| FITC anti-mouse F4/80                 | BM8          | BioLegend          | 123108                | 1:100           |
| FITC anti-mouse Ly-6G                 | 1A8          | BioLegend          | 127606                | 1:100           |
| FITC anti-mouse Ly-6C                 | HK1.4        | BioLegend          | 128006                | 1:100           |
| FITC anti-mouse I-A/I-E               | M5/114.15.2  | BioLegend          | 107606                | 1:100           |
| FITC anti-mouse/human CD44            | IM7          | BioLegend          | 103006                | 1:100           |
| FITC anti-human/mouse Granzyme B      | QA16A02      | BioLegend          | 372206                | 1:100           |
| FITC anti-mouse CD86                  | GL-1         | BioLegend          | 105006                | 1:100           |
| PE anti-mouse H-2                     | M1/42        | BioLegend          | 125506                | 1:100           |
| PE anti-mouse CD8a                    | 53-6.7       | BioLegend          | 100708                | 1:100           |
| PE anti-mouse Ly-6C                   | HK1.4        | BioLegend          | 128008                | 1:100           |
| PE anti-mouse CD252 (OX40 Ligand)     | RM134L       | BioLegend          | 108816                | 1:100           |
| PE anti-mouse CD206                   | C068C2       | BioLegend          | 141706                | 1:100           |
| PE anti-mouse/human CD11b             | M1/70        | BioLegend          | 101208                | 1:100           |
| PE anti-mouse CD4                     | GK1.5        | BioLegend          | 100408                | 1:100           |
| PE anti-mouse Ly-6G                   | 1A8          | BioLegend          | 127608                | 1:100           |
| PE anti-mouse F4/80                   | BM8          | BioLegend          | 123110                | 1:100           |
| PE anti-mouse CD62L                   | MEL-14       | BioLegend          | 104408                | 1:100           |
| PE anti-mouse CD80                    | 16-10A1      | BioLegend          | 104708                | 1:100           |
| Alexa Fluor® 594 anti-iNOS            | W16030C      | BioLegend          | 696804                | 1:100           |
| APC anti-mouse CD80                   | 16-10A1      | BioLegend          | 104714                | 1:100           |
| APC anti-mouse CD4                    | RM4-5        | BioLegend          | 100516                | 1:100           |
| APC anti-mouse F4/80                  | BM8          | BioLegend          | 123116                | 1:100           |
| APC anti-mouse CD11c                  | N418         | BioLegend          | 117310                | 1:100           |
| APC anti-mouse LY-6C                  | HK1.4        | BioLegend          | 128016                | 1:100           |
| APC anti-mouse IFN- $\gamma$          | XMG1.2       | BioLegend          | 505810                | 1:100           |
| Brilliant Violet 650 anti-mouse F4/80 | BM8          | BioLegend          | 123149                | 1:100           |
| Brilliant Violet 785 anti-mouse CD62L | MEL-14       | BioLegend          | 104440                | 1:100           |
| PE/Dazzle™ 594 anti-mouse Ly-6C       | HK1.4        | BioLegend          | 128044                | 1:100           |
| Pacific Blue anti-mouse CD45 Antibody | 30-F11       | BioLegend          | 103126                | 1:100           |
| Biotin anti-mouse IL12/23 (p40)       | C17.8        | BioLegend          | 505302                | 1:100           |

|                                                       |           |                |            |         |
|-------------------------------------------------------|-----------|----------------|------------|---------|
| Biotin anti-mouse IL-10                               | JES5-2A5  | BioLegend      | 504906     | 1:100   |
| Biotin anti-mouse IFN- $\beta$ Antibody               | MIB-5E9.1 | BioLegend      | 508105     | 1:100   |
| Anti-Mo/Rt FOXP3, eBioscience                         | FJK-16s   | Invitrogen     | 14-5773-82 | 1:100   |
| PE/Cy7 anti-mouse CD8a                                | 53-6.7    | BioLegend      | 100722     | 1:100   |
| PerCP anti-mouse CD11c                                | N418      | BioLegend      | 117326     | 1:100   |
| PerCP/Cy5.5 anti-mouse NK-1.1                         | PK136     | BioLegend      | 108728     | 1:100   |
| PE/Cy7 anti-mouse CD19                                | 6D5       | BioLegend      | 115520     | 1:100   |
| PE/Cy7 anti-mouse Ly-6G                               | 1A8       | BioLegend      | 127618     | 1:100   |
| Pacific Blue anti-mouse/human CD44                    | IM7       | BioLegend      | 103020     | 1:100   |
| Pacific Blue anti-mouse CD11b                         | M1/70     | BioLegend      | 101224     | 1:100   |
| Mouse FcR Blocker                                     | 2.4G2     | BioXCell       | BE0307     | 1:100   |
| InVivoMAb anti-mouse CSF1R                            | AFS98     | BioXCell       | BP0213     | 1:100   |
| InVivoPlus anti-mouse CD4                             | GK1.5     | BioXCell       | BP0003-1   | 1:100   |
| InVivoPlus anti-mouse CD8                             | 2.43      | BioXCell       | BE0061     | 1:100   |
| InVivoPlus anti-mouse PD-L1 (B7-H1)                   | 10F.9G2   | BioXCell       | BP0101     | 1:100   |
| InVivoMAb anti-mouse CD47 (IAP)                       | MIAP301   | BioXCell       | BE0270     | 1:100   |
| PE-H-2Kb MuLV p15E Tetramer                           | N.A       | MBL            | TB-M507-1  | 1:100   |
| PE-H-2Db Adpgk Neoepitope Tetramer                    | N.A       | MBL            | TB-5113-1  | 1:100   |
| biotin-conjugated anti-mouse CD8a                     | 53-6.7    | BioLegend      | 100704     | 1:100   |
| Streptavidin-PE                                       | N.A       | BioLegend      | 405204     | 1:100   |
| Alexa488-conjugated anti-mouse IgG secondary antibody | N.A       | Invitrogen     | A28175     | 1:1000  |
| Phospho-p38 MAPK (Thr180/Tyr182) XP® Rabbit mAb       | D3F9      | Cell Signaling | 4511S      | 1:1000  |
| p38 MAPK XP® Rabbit mAb                               | D13E1     | Cell Signaling | 8690S      | 1:1000  |
| Phospho-NF- $\kappa$ B p65 (Ser536) Rabbit mAb        | 93H1      | Cell Signaling | 3033S      | 1:1000  |
| NF- $\kappa$ B p65 XP® Rabbit mAb                     | D14E12    | Cell Signaling | 8242S      | 1:1000  |
| $\beta$ -Actin Rabbit mAb                             | 1.30E+06  | Cell Signaling | 4970S      | 1:1000  |
| Goat anti-Rabbit IgG (H+L) Secondary Antibody, HRP    | N.A       | Invitrogen     | 31460      | 1:10000 |
| Calreticulin XP® Rabbit mAb                           | D3E6      | Cell Signaling | 12238S     | 1:100   |
| Goat anti-Rabbit IgG (H+L) Secondary Antibody, PE     | N.A       | Invitrogen     | P-2771MP   | 1:1000  |
