# Supplementary material for: Intratumoral SIRPα-deficient macrophages activate tumor antigen-specific cytotoxic T cells under radiotherapy
Source: PubMed Central journal article supplement (PMC8163884; doi:10.1038/s41467-021-23442-z), 2021-05-28
Supplement: 41467_2021_23442_MOESM3_ESM.pdf [file 41467_2021_23442_MOESM3_ESM.pdf]

## Descriptions of Additional Supplementary Files

### **Supplementary Movie 1**

**Description:** TIL isolated from irradiated MC38 tumors in *Sirpα*<sup>-/-</sup> mice kill MC38 cells. MC38 tumors in *Sirpα*<sup>-/-</sup> mice were irradiated with a single fraction of 8Gy. Three days post-irradiation, CD8<sup>+</sup> TIL were isolated from irradiated tumors and incubated with MC38 cells at a ratio of 1:4 (MC38:CD8<sup>+</sup> TIL). Real-time videos recording TIL killing MC38 cells were made using a Nikon camera (DS-Qi1MC) with NIS-Elements software BR 4.20.00 (Nikon Instruments) that captures images at ten-second intervals over a three-hour period.

### **Supplementary Movie 2**

**Description:** In vitro generated MC38-specific Tc kill MC38 cells. MC38-specific Tc generated by incubating MC38 TIL with MC38 tumor antigen-loaded *Sirpα*<sup>-/-</sup> macrophages were cocultured with MC38 cells at a ratio of 1:3 (MC38:CD8<sup>+</sup> Tc). Real-time videos recording Tc killing MC38 cells were made using a Nikon camera (DS-Qi1MC) with NIS-Elements software BR 4.20.00 (Nikon Instruments) that captures images at ten-second intervals over a three-hour period.

### **Supplementary Movie 3**

**Description:** In vitro generated KPC-specific Tc kill KPC cells. KPC-specific Tc were generated by incubating KPC TIL with KPC tumor antigen-loaded *Sirpα*<sup>-/-</sup> macrophages and then were cocultured with KPC cells at a ratio of 1:3 (KPC:CD8<sup>+</sup> Tc). Real-time videos recording Tc killing KPC cells were made using a Nikon camera (DS-Qi1MC) with NIS-Elements software BR 4.20.00 (Nikon Instruments) that captures images at ten-second intervals over a three-hour period.
